# Supplementary material for: Validation of a High-Performance Liquid Chromatography with Photodiode Array Detection Method for the Separation and Quantification of Antioxidant and Skin Anti-Aging Flavonoids from Nelumbo nucifera Gaertn. Stamen Extract
Source: MDPI journal article supplement (doi:10.3390/molecules27031102), 2022-02-07
Supplement: s1 [file s1]

# Validation of a High-Performance Liquid Chromatography with Photodiode Array Detection Method for the Separation and Quantification of Antioxidant and Skin Anti-Aging Flavonoids from *Nelumbo nucifera* Gaertn. Stamen Extract

Duangjai Tungmunnithum <sup>1,2,3,\*</sup>, Samantha Drouet <sup>2</sup> and Christophe Hano <sup>2,3,\*</sup>

<sup>1</sup> Department of Pharmaceutical Botany, Faculty of Pharmacy, Mahidol University, Bangkok 10400, Thailand

<sup>2</sup> Laboratoire de Biologie des Ligneux et des Grandes Cultures, INRAE USC1328, Campus Eure et Loir,

Orleans University, 28000 Chartres, France; samantha.drouet@univ-orleans.fr

<sup>3</sup> Le Studium Institute for Advanced Studies, 1 Rue Dupanloup, 45000 Orléans, France

\* Correspondence: duangjai.tun@mahidol.ac.th (D.T.); hano@univ-orleans.fr (C.H.)

**Table S1.** Quantification of the major flavonoids from *N. nucifera* stamen extract compared to the whole flower extract.

|           | STAMEN       | WHOLE FLOWER |
|-----------|--------------|--------------|
| Myr-3-Glc | 5.94 ± 0.23  | 1.11 ± 0.90  |
| Rut       | 4.68 ± 0.14  | 0.98 ± 0.11  |
| Que-3-Glu | 3.21 ± 0.09  | 1.07 ± 0.07  |
| Kae-3-Rob | 8.99 ± 0.21  | 2.15 ± 0.10  |
| Kae-3-Glc | 10.81 ± 0.36 | 3.43 ± 0.06  |
| Kae-3-Glu | 16.05 ± 0.34 | 4.22 ± 0.14  |
| Iso-3-Glc | 4.09 ± 0.17  | 1.21 ± 0.05  |

Mean ± standard deviations (n = 3). Myr: myricetin; Myr-3-O-Glc: Myr-3-O-glucoside; Que: quercetin; rut : rutinoside; rutin: Quer-3-O-Rut; Quer-3-O-Glu: Quer-3-O-glucuronic acid; Kae: kaempferol; Kae-3-O-Glc: Kae-3-O-glucoside; Kae-3-O-Rob: Kae-3-O-robinobioside; Kae-3-O-Glu: Kae-3-O-glucuronic acid; Iso: isorhamnetin; Iso-3-O-Glc: Iso-3-O-glucoside.
